# Supplementary material for: Genome-wide association study uncovers new genetic loci and candidate genes underlying seed chilling-germination in maize
Source: PeerJ. 2021 Jun 28;9:e11707. doi: 10.7717/peerj.11707 (PMC8247712; doi:10.7717/peerj.11707)
Supplement: Supplemental Information 13 [file peerj-09-11707-s013.xlsx]

## Sheet: Sheet1
taxa	cold-FG	cold-TG	cold-RL	cold-SL	cold-RRS
SCL001	0.2	0.72	1.46667	0.666667	0.454545
SCL002	0.48	0.64	1.9	0.9	0.473684
SCL003	0.12	0.12	1.23333	0.766667	0.621622
SCL004	0.12	0.2	1.46667	0.7	0.477273
SCL005	0.346667	0.493333	2.36667	1.16667	0.492958
SCL006	0.386667	0.466667	2.8	0.8	0.285714
SCL007	0.24	0.546667	2.03333	0.533333	0.262295
SCL008	0.32	0.32	2.93333	1.23333	0.420455
SCL009	0.253333	0.32	2.63333	1.23333	0.468354
SCL010	0.533333	0.813333	3.13333	1.5	0.478723
SCL012	0.466667	0.786667	2.16667	1.53333	0.707692
SCL013	0.106667	0.173333	2.43333	1.46667	0.60274
SCL014	0.133333	0.24	2.53333	0.8	0.315789
SCL015	0.146667	0.16	2.46667	1.4	0.567568
SCL016	0.28	0.346667	2.8	0.666667	0.238095
SCL017	0.28	0.36	3.8	1.26667	0.333333
SCL018	0.12	0.12	1.23333	0.766667	0.621622
SCL021	0	0.0666667	1.06667	0.466667	0.4375
SCL022	0.16	0.12	1.5	0.4	0.266667
SCL023	0.213333	0.266667	2.13333	1.26667	0.59375
SCL024	0.16	0.226667	3.2	0.866667	0.270833
SCL025	0.546667	0.8	3.2	1.3	0.40625
SCL026	0.12	0.2	2.86667	1.03333	0.360465
SCL027	0.04	0.0666667	1.46667	0.9	0.613636
SCL028	0.52	0.666667	3.26667	1.3	0.397959
SCL029	0.2	0.306667	4.06667	1.4	0.344262
SCL030	0.106667	0.133333	1.2	0.7	0.583333
SCL031	0.0933333	0.12	3.26667	1.3	0.397959
SCL032	0.12	0.12	4.53333	1.46667	0.323529
SCL033	0.2	0.32	1.5	0.733333	0.488889
SCL034	0.08	0.4	1.5	0.966667	0.644444
SCL035	0.106667	0.0533333	1.4	0.5	0.357143
SCL036	0.04	0.08	1.53333	1.03333	0.673913
SCL038	0.106667	0.0533333	2.63333	0.5	0.189873
SCL039	0.0933333	0.533333	1.5	0.4	0.266667
SCL041	0.04	0.133333	1.63333	1.23333	0.755102
SCL042	0.08	0.08	1.2	0.433333	0.361111
SCL043	0.24	0.333333	4.6	0.833333	0.181159
SCL045	0.12	0.213333	4.5	1.33333	0.296296
SCL046	0.04	0.226667	1.73333	0.4	0.230769
SCL047	0.04	0.04	1.56667	0.733333	0.468085
SCL048	0.0533333	0.0933333	0.866667	0.4	0.461538
SCL049	0.04	0.04	2.16667	1.23333	0.569231
SCL050	0.04	0.0933333	1.2	0.4	0.333333
SCL052	0.106667	0.373333	4.53333	1.26667	0.279412
SCL053	0.04	0.133333	1.66667	0.566667	0.34
SCL056	0.0266667	0.08	1.4	0.866667	0.619048
SCL059	0.08	0.133333	1.6	0.7	0.4375
SCL060	0.04	0.12	3.16667	1.13333	0.357895
SCL062	0	0.106667	3.7	1.53333	0.414414
SCL063	0.186667	0.546667	3.1	1.4	0.451613
SCL064	0.2	0.12	1.56667	0.4	0.255319
SCL065	0.04	0.226667	1.4	0.666667	0.47619
SCL066	0.32	0.386667	3.2	1.1	0.34375
SCL067	0.2	0.2	1.96667	0.4	0.20339
SCL068	0.106667	0.4	1.56667	0.4	0.255319
SCL069	0.08	0.16	1.26667	0.6	0.473684
SCL070	0.12	0.12	1.13333	0.7	0.617647
SCL071	0.226667	0.413333	3.3	0.766667	0.232323
SCL072	0.2	0.4	2.33333	0.7	0.3
SCL073	0.32	0.4	1.43333	0.733333	0.511628
SCL074	0.04	0.0533333	1.66667	0.7	0.42
SCL075	0.08	0.12	2.46667	1.36667	0.554054
SCL076	0.08	0.16	3.7	1.53333	0.414414
SCL078	0.36	0.813333	4.4	1.23333	0.280303
SCL079	0.226667	0.426667	3.16667	1.66667	0.526316
SCL080	0.373333	0.6	2.03333	0.433333	0.213115
SCL081	0.08	0.2	0.8	0.566667	0.708333
SCL082	0.253333	0.626667	2.6	0.633333	0.24359
SCL084	0	0.0933333	1.9	1.26667	0.666667
SCL085	0.36	0.44	2.53333	1.63333	0.644737
SCL087	0.32	0.426667	1.46667	0.7	0.477273
SCL088	0.16	0.16	1.13333	0.433333	0.382353
SCL089	0.346667	0.626667	4.66667	1.63333	0.35
SCL090	0.186667	0.24	1.7	0.966667	0.568627
SCL092	0	0.0933333	2.3	0.466667	0.202899
SCL093	0.24	0.453333	4.53333	1.56667	0.345588
SCL094	0.2	0.533333	3.43333	0.766667	0.223301
SCL095	0.333333	0.466667	1.66667	0.733333	0.371429
SCL096	0.333333	0.666667	3.33333	1.43333	0.43
SCL097	0.24	0.453333	0.9	1	1.11111
SCL098	0.04	0.04	1.16667	0.466667	0.4
SCL099	0.0933333	0.12	4.3	0.866667	0.20155
SCL100	0.24	0.24	1.6	0.7	0.4375
SCL101	0.16	0.16	1.6	0.733333	0.458333
SCL102	0.44	0.586667	4.26667	1.2	0.28125
SCL103	0.08	0.213333	2.36667	0.8	0.338028
SCL104	0.0666667	0.0666667	1.66667	1.43333	0.390909
SCL105	0	0.0933333	0.933333	0.466667	0.5
SCL106	0	0.04	2.33333	1.1	0.471429
SCL107	0.2	0.24	2	1.06667	0.533333
SCL108	0.106667	0.306667	1.43333	0.5	0.348837
SCL109	0	0.133333	0.5	0.5	1
SCL110	0.16	0.32	1.5	0.733333	0.488889
SCL112	0.0933333	0.36	1.1	0.7	0.636364
SCL113	0.0933333	0.133333	0.8	0.7	0.875
SCL114	0.213333	0.266667	1.96667	0.633333	0.322034
SCL115	0.173333	0.52	2	0.5	0.25
SCL116	0.0933333	0.28	2.26667	0.733333	0.323529
SCL117	0.0666667	0.266667	2.2	1.4	0.636364
SCL118	0.12	0.32	1.63333	1.23333	0.755102
SCL120	0.0266667	0.0933333	1.93333	1.33333	0.689655
SCL121	0.52	0.6	1.63333	1.26667	0.77551
SCL122	0.0133333	0.0666667	2.73333	1.1	0.402439
SCL123	0.36	0.533333	2.96667	0.666667	0.224719
SCL124	0.106667	0.146667	0.8	0.533333	0.666667
SCL125	0.146667	0.306667	2.33333	1.16667	0.5
SCL128	0.16	0.4	1.5	0.966667	0.644444
SCL130	0	0.466667	0.933333	0.6	0.642857
SCL132	0.186667	0.32	1.46667	0.666667	0.454545
SCL133	0.48	0.56	1.66667	0.566667	0.34
SCL134	0.4	0.2	1.66667	0.7	0.42
SCL135	0.36	0.12	1.66667	0.533333	0.32
SCL137	0.0133333	0.04	1.43333	0.866667	0.604651
SCL138	0.106667	0.106667	1	0.966667	0.966667
SCL141	0	0.106667	0.866667	0.4	0.461538
SCL142	0.04	0.04	1	0.833333	0.833333
SCL143	0	0.106667	1.36667	0.7	0.512195
SCL144	0.32	0.48	4.3	1.46667	0.341085
SCL145	0.12	0.213333	2.26667	1.3	0.573529
SCL147	0	0.133333	1.46667	0.466667	0.318182
SCL148	0	0.146667	0.933333	0.8	0.857143
SCL149	0	0.2	1.16667	0.8	0.685714
SCL152	0.12	0.24	1.86667	0.766667	0.410714
SCL153	0	0.4	2.46667	0.8	0.324324
SCL154	0.04	0.0666667	0.866667	0.433333	0.5
SCL155	0.2	0.266667	1.96667	0.7	0.355932
SCL156	0.453333	0.653333	3.3	0.9	0.272727
SCL157	0.04	0.0666667	2.23333	0.9	0.402985
SCL158	0	0.24	1.2	0.533333	0.444444
SCL160	0	0.16	0.9	0.566667	0.62963
SCL162	0.106667	0.333333	2.06667	1.06667	0.516129
SCL163	0.56	0.68	1.66667	1.53333	0.92
SCL164	0.2	0.64	1.46667	0.666667	0.454545
SCL165	0.133333	0.306667	3.2	1.6	0.5
SCL166	0.0933333	0.146667	1.2	0.666667	0.555556
SCL167	0.0933333	0.12	1.33333	0.533333	0.4
SCL168	0	0.106667	1	0.633333	0.633333
SCL169	0.106667	0.146667	1.63333	1.26667	0.77551
SCL171	0.106667	0.413333	1.36667	0.766667	0.560976
SCL172	0.2	0.52	1.73333	0.733333	0.423077
SCL173	0	0.0666667	1.36667	0.633333	0.463415
SCL174	0.0266667	0.0933333	0.933333	0.833333	0.892857
SCL175	0	0.04	1.46667	0.866667	0.590909
SCL176	0.293333	0.653333	2.63333	0.7	0.265823
SCL177	0.04	0.08	1.73333	1.13333	0.653846
SCL178	0.0933333	0.346667	1.16667	0.733333	0.628571
SCL179	0.533333	0.813333	4.3	1.2	0.27907
SCL181	0.24	0.24	2.2	1.36667	0.621212
SCL183	0.106667	0.0933333	1.23333	1.1	0.891892
SCL184	0.173333	0.373333	3.43333	1	0.291262
SCL186	0.0133333	0.08	1.86667	0.9	0.482143
SCL189	0	0.146667	0.833333	0.766667	0.92
SCL191	0.173333	0.306667	3.2	1.33333	0.416667
SCL192	0	0.186667	0.9	0.533333	0.592593
SCL193	0	0.04	0.5	0.5	1
SCL194	0.12	0.2	1.46667	0.7	0.477273
SCL195	0.12	0.146667	1.96667	0.5	0.254237
SCL196	0.04	0.0933333	0.766667	0.433333	0.565217
SCL198	0.24	0.16	1.5	0.4	0.266667
SCL199	0.293333	0.96	2.73333	1.33333	0.487805
SCL200	0.266667	0.48	1.1	1.1	1
SCL203	0.6	0.893333	2.76667	1.16667	0.421687
SCL204	0.106667	0.44	2.76667	1.43333	0.518072
SCL205	0.12	0.373333	1.73333	0.866667	0.5
SCL206	0.2	0.2	2.5	1.33333	0.533333
SCL208	0.146667	0.16	2.63333	1.26667	0.481013
SCL209	0.146667	0.426667	3.3	1.1	0.333333
SCL210	0.24	0.306667	4.23333	0.966667	0.228346
SCL211	0.533333	0.84	4.4	1.4	0.318182
SCL212	0.386667	0.44	1.7	1.16667	0.686275
SCL214	0.08	0.08	1.7	0.866667	0.509804
SCL215	0.293333	0.386667	3	1.66667	0.555556
SCL216	0.08	0.186667	1.06667	0.7	0.65625
SCL217	0.08	0.08	1.33333	1.1	0.825
SCL218	0.4	0.52	2.56667	1.3	0.506494
SCL220	0.12	0.0933333	1.56667	0.733333	0.468085
SCL221	0.186667	0.533333	1.96667	0.733333	0.372881
SCL222	0.04	0.106667	0.766667	0.4	0.521739
SCL223	0.12	0.12	0.9	0.5	0.555556
SCL225	0.146667	0.306667	1.8	1.4	0.777778
SCL226	0.08	0.28	1.46667	0.666667	0.454545
SCL227	0.2	0.2	2.13333	0.9	0.421875
SCL229	0.28	0.36	0.9	0.666667	0.740741
SCL230	0.24	0.853333	4.13333	1.4	0.33871
SCL231	0.12	0.306667	1.86667	0.433333	0.232143
SCL232	0.546667	0.68	3.13333	1.03333	0.329787
SCL233	0	0.04	0.9	0.4	0.444444
SCL234	0.4	0.786667	4.26667	1.03333	0.242188
SCL236	0.04	0.04	2	1	0.5
SCL238	0.266667	0.68	3.5	0.966667	0.27619
SCL239	0.533333	0.786667	2.53333	1.16667	0.460526
SCL240	0.0533333	0.186667	1.13333	0.633333	0.558824
SCL241	0.04	0.12	1.26667	0.4	0.315789
SCL242	0.04	0.04	0.9	0.4	0.444444
SCL244	0.133333	0.213333	1.53333	1.03333	0.673913
SCL245	0.24	0.266667	4.33333	0.933333	0.215385
SCL246	0.146667	0.6	1.1	0.5	0.454545
SCL247	0.12	0.16	2.56667	0.933333	0.363636
SCL248	0.213333	0.373333	3.9	1	0.25641
SCL249	0.133333	0.266667	1.43333	0.766667	0.534884
SCL250	0.4	0.466667	3.13333	1.1	0.351064
SCL251	0.226667	0.68	1.96667	1.1	0.559322
SCL252	0.12	0.32	1.06667	0.466667	0.4375
SCL253	0.266667	0.813333	3.56667	0.766667	0.214953
SCL254	0.213333	0.6	2.86667	1	0.348837
SCL255	0.0666667	0.0666667	3.93333	1.63333	0.415254
SCL256	0.12	0.133333	4	1.1	0.275
SCL257	0.453333	0.453333	2.16667	1.2	0.553846
SCL258	0.24	0.546667	1.6	0.733333	0.458333
SCL259	0.106667	0.173333	0.733333	0.4	0.545455
SCL261	0.0933333	0.12	2.23333	1.06667	0.477612
SCL262	0.12	0.12	3.33333	1.13333	0.34
SCL263	0.253333	0.32	3.8	1.26667	0.333333
SCL264	0.133333	0.426667	2.53333	0.666667	0.263158
SCL265	0.226667	0.373333	3.06667	0.866667	0.282609
SCL266	0.24	0.4	2.3	0.966667	0.42029
SCL267	0.426667	0.546667	2.36667	0.933333	0.394366
SCL268	0.386667	0.706667	2.36667	0.733333	0.309859
SCL269	0	0.133333	1.7	0.7	0.411765
SCL270	0.08	0.213333	2.8	1.26667	0.452381
SCL271	0.36	0.24	1.5	0.733333	0.488889
SCL272	0.56	0.84	3.2	1.2	0.375
SCL273	0.0533333	0.106667	1.16667	0.933333	0.8
SCL274	0.12	0.24	1.8	0.833333	0.462963
SCL275	0.04	0.226667	2.56667	1.26667	0.493506
SCL276	0.24	0.453333	4.3	0.8	0.186047
SCL277	0.266667	0.373333	1.06667	0.633333	0.59375
SCL279	0.12	0.36	1.33333	1.13333	0.85
SCL280	0.0266667	0.133333	1.2	1.16667	0.972222
SCL282	0.08	0.16	1.46667	0.9	0.613636
SCL283	0	0.04	1.4	0.8	0.571429
SCL284	0.106667	0.173333	2.33333	0.933333	0.4
SCL285	0.36	0.48	1.9	1	0.526316
SCL287	0.48	0.733333	2.23333	1.16667	0.522388
SCL288	0.24	0.28	3.23333	1.6	0.494845
SCL289	0.306667	0.613333	2.63333	1.36667	0.518987
SCL290	0.4	0.44	3.33333	1.23333	0.37
SCL292	0.106667	0.213333	2.2	0.733333	0.333333
SCL293	0.293333	0.666667	3.36667	0.566667	0.168317
SCL294	0.133333	0.2	1.43333	0.466667	0.325581
SCL295	0	0.0933333	1.33333	0.4	0.3
SCL296	0.52	0.893333	3.7	1.03333	0.279279
SCL297	0.24	0.466667	2.76667	0.7	0.253012
SCL298	0.0533333	0.133333	0.9	0.566667	0.62963
SCL299	0.2	0.2	1.73333	0.733333	0.423077
SCL301	0.293333	0.373333	3.43333	0.966667	0.281553
SCL302	0	0.04	0.7	0.5	0.714286
SCL303	0.32	0.36	4.36667	1.43333	0.328244
SCL304	0.0533333	0.173333	0.7	0.4	0.571429
SCL305	0.16	0.266667	1.9	0.7	0.368421
SCL306	0.213333	0.426667	0.8	0.6	0.75
SCL307	0.32	0.733333	3.28333	0.766667	0.233503
SCL308	0.0933333	0.173333	1.23333	0.933333	0.756757
SCL309	0.12	0.146667	1.4	0.633333	0.452381
SCL310	0.106667	0.24	1.23333	0.4	0.324324
SCL311	0.106667	0.346667	1.06667	0.4	0.375
SCL312	0.2	0.266667	3.28333	1.16667	0.35533
SCL313	0.2	0.56	1.5	0.966667	0.644444
SCL314	0.08	0.28	1.53333	1.03333	0.673913
SCL315	0.12	0.28	1.56667	0.733333	0.468085
SCL317	0.08	0.16	3.73333	0.6	0.160714
SCL319	0	0.0533333	0.666667	0.6	0.9
SCL320	0.0933333	0.386667	2.26667	0.5	0.220588
SCL321	0.106667	0.333333	2.33333	0.733333	0.314286
SCL323	0.04	0.133333	2.5	1.1	0.44
SCL324	0	0.04	0.733333	0.4	0.545455
SCL325	0.04	0.0533333	2.26667	1.36667	0.602941
SCL326	0.44	0.853333	3.23333	1.06667	0.329897
SCL327	0.4	0.44	2.26667	0.833333	0.367647
SCL328	0.266667	0.306667	2.3	1.23333	0.536232
SCL330	0.306667	0.493333	2.13333	0.9	0.421875
SCL331	0.106667	0.0533333	2.66667	1.4	0.525
SCL332	0.0533333	0.186667	1.1	0.4	0.363636
SCL333	0.2	0.32	1.36667	0.4	0.292683
SCL334	0.266667	0.386667	3.03333	0.666667	0.21978
SCL335	0.106667	0.2	1.13333	0.4	0.352941
SCL336	0.52	0.72	2.53333	0.6	0.236842
SCL337	0.453333	0.76	3.33333	0.4	0.12
SCL339	0.12	0.28	1.66667	0.533333	0.32
SCL340	0.48	0.573333	3.56667	0.933333	0.261682
SCL341	0.173333	0.173333	1.7	0.833333	0.490196
SCL342	0.04	0.04	2.7	1.63333	0.604938
SCL343	0.08	0.253333	2.96667	0.6	0.202247
SCL344	0.16	0.2	4.6	1.46667	0.318841
SCL345	0.24	0.253333	2.3	1.26667	0.550725
SCL347	0.226667	0.266667	2.8	1.43333	0.511905
SCL348	0.0533333	0.16	1.26667	1.16667	0.921053
SCL349	0.133333	0.28	3.63333	1.46667	0.40367
SCL350	0.12	0.453333	3.46667	1.36667	0.394231
SCL351	0	0.466667	2.46667	1.1	0.445946
SCL352	0.333333	0.4	3.33333	0.566667	0.17
SCL353	0.04	0.186667	3.3	1.46667	0.444444
SCL354	0.173333	0.186667	1.66667	1.53333	0.92
SCL355	0.173333	0.24	1.96667	1.46667	0.745763
SCL356	0.16	0.306667	1.26667	1.43333	0.335938
SCL357	0.2	0.226667	4.53333	1.6	0.352941
SCL358	0.173333	0.213333	2.53333	1.53333	0.605263
SCL359	0.2	0.28	2.13333	0.566667	0.265625
SCL360	0.173333	0.32	1.2	1.06667	0.888889
