# Supplementary material for: Genome-wide association study uncovers new genetic loci and candidate genes underlying seed chilling-germination in maize
Source: PeerJ. 2021 Jun 28;9:e11707. doi: 10.7717/peerj.11707 (PMC8247712; doi:10.7717/peerj.11707)
Supplement: Supplemental Information 14 [file peerj-09-11707-s014.xlsx]

## Sheet: Sheet1
rs#	alleles	chrom	pos	strand	assembly#	center	protLSID	assayLSID	panelLSID	QCcode	SCL001	SCL002	SCL003	SCL004	SCL005	SCL006	SCL007	SCL008	SCL009	SCL010	SCL012	SCL013	SCL014	SCL015	SCL016	SCL017	SCL018	SCL021	SCL022	SCL023	SCL024	SCL025	SCL026	SCL027	SCL028	SCL029	SCL030	SCL031	SCL032	SCL033	SCL034	SCL035	SCL036	SCL038	SCL039	SCL041	SCL042	SCL043	SCL045
PZE-108086767	A/C	8	144375088	+	NA	NA	NA	NA	NA	NA	AA	AA	AA	AA	AA	NN	NN	CC	NN	AA	NN	AA	AA	AA	CC	AA	AA	CC	AA	NN	CC	NN	CC	CC	AA	AA	NN	NN	NN	CC	AA	NN	CC	NN	AA	CC	AC	AA	NN
PZE-102118136	A/G	2	158379376	+	NA	NA	NA	NA	NA	NA	AA	AA	AA	AA	GG	AA	AA	AA	AA	AA	AA	GG	GG	AA	AA	AA	AA	AA	AA	AA	AA	AA	AA	AA	AA	AA	AA	AA	AA	AA	AA	AA	AA	AA	AA	AA	AA	AA	AA
PZE-102193367	G/A	2	236235981	+	NA	NA	NA	NA	NA	NA	GG	GG	GG	AA	GG	GG	GG	AA	GG	AA	AA	AA	GG	AA	GG	GG	GG	GG	GG	GG	AA	GG	AA	GG	AA	GG	AA	AA	AA	AA	GG	GG	AA	GG	GG	AA	GG	AA	AA
PZE-103096466	C/A	3	156304805	+	NA	NA	NA	NA	NA	NA	CC	AA	CC	AA	AA	CC	CC	CC	AA	AA	AA	AA	CC	CC	CC	CC	CC	CC	AA	AA	CC	CC	CC	CC	CC	CC	CC	CC	CC	CC	CC	CC	CC	CC	CC	CC	CC	CC	CC
SYN8915	G/A	3	196150129	+	NA	NA	NA	NA	NA	NA	GG	GG	GG	GG	GG	GG	GG	GG	GG	GG	GG	GG	GG	AA	GG	GG	GG	GG	AA	GG	GG	GG	GG	GG	GG	GG	GG	GG	GG	AA	AA	AA	AA	GG	AG	GG	AA	AA	GG
PZE-104042136	C/A	4	58031648	+	NA	NA	NA	NA	NA	NA	CC	CC	AA	CC	AA	CC	CC	CC	CC	CC	CC	CC	AA	AA	AA	AA	CC	CC	AA	CC	AA	AA	AA	AA	AA	AA	AA	AA	AA	CC	CC	CC	CC	AA	AA	CC	NN	AA	AA
PZE-105052784	C/A	5	48384424	+	NA	NA	NA	NA	NA	NA	CC	CC	AC	AA	CC	CC	CC	CC	CC	CC	CC	AA	AA	AA	AA	CC	CC	CC	CC	CC	AA	CC	AA	AA	CC	AA	CC	AA	AA	AA	AA	CC	CC	CC	CC	CC	CC	CC	AC
PZE-105056721	C/A	5	54915313	+	NA	NA	NA	NA	NA	NA	AC	CC	CC	NN	AA	CC	CC	CC	CC	CC	CC	AA	CC	CC	CC	AA	AA	AA	AA	CC	CC	AA	AA	CC	CC	CC	CC	CC	CC	CC	CC	CC	AA	CC	AA	AA	AA	CC	AC
PZE-107018981	A/G	7	17240858	+	NA	NA	NA	NA	NA	NA	AA	AA	AA	AA	NN	AA	AA	AA	AA	AA	AA	AA	GG	AA	AA	AA	GG	GG	AA	AA	AA	AA	GG	AA	NN	AA	GG	GG	AA	AA	AA	AA	AA	AA	AA	GG	AA	GG	AA
SYN13495	A/C	7	125974879	+	NA	NA	NA	NA	NA	NA	CC	AA	CC	CC	NN	CC	NN	NN	NN	AA	AA	AA	AA	NN	CC	AA	CC	AA	CC	NN	CC	CC	CC	CC	CC	CC	CC	AA	AA	AA	AA	CC	AA	CC	AA	AA	CC	CC	CC
PZE-107112738	C/A	7	161949846	+	NA	NA	NA	NA	NA	NA	CC	CC	CC	CC	AA	CC	AA	CC	AA	CC	CC	CC	CC	AA	CC	CC	CC	CC	CC	AA	CC	CC	CC	CC	CC	AA	CC	CC	CC	CC	CC	AA	AA	CC	CC	CC	CC	CC	CC
SYN2994	G/A	8	112768552	+	NA	NA	NA	NA	NA	NA	AA	AA	AA	AA	GG	AA	GG	AA	AA	NN	GG	GG	GG	GG	GG	GG	AA	AG	AA	AA	GG	AA	GG	GG	AA	GG	GG	AA	GG	AA	GG	AA	AA	AA	GG	GG	AA	GG	AA
PZE-108063385	A/G	8	113291192	+	NA	NA	NA	NA	NA	NA	GG	GG	GG	AA	AA	AA	AA	AA	AA	GG	AA	AA	GG	AA	GG	AA	GG	GG	AA	AA	GG	GG	GG	AA	AA	GG	AA	GG	AA	GG	AA	GG	AA	GG	GG	GG	AA	AA	AA
PZE-108134421	G/A	8	173977740	+	NA	NA	NA	NA	NA	NA	GG	AA	GG	NN	AA	AA	GG	GG	GG	GG	GG	NN	AA	GG	GG	GG	GG	GG	GG	GG	GG	GG	AA	GG	AA	GG	GG	GG	GG	GG	AA	GG	AA	AA	GG	GG	GG	GG	AA
PZB02554.2	C/A	10	142190907	+	NA	NA	NA	NA	NA	NA	AA	AA	CC	CC	CC	AA	AA	CC	CC	AA	AA	CC	CC	CC	CC	CC	CC	CC	AA	CC	CC	AA	CC	AA	CC	AA	CC	CC	CC	CC	CC	AA	AA	AA	CC	CC	AC	AA	AA
[truncated: 261 more columns]
