# Supplementary material for: Genome-wide association study uncovers new genetic loci and candidate genes underlying seed chilling-germination in maize
Source: PeerJ. 2021 Jun 28;9:e11707. doi: 10.7717/peerj.11707 (PMC8247712; doi:10.7717/peerj.11707)
Supplement: Supplemental Information 15 [file peerj-09-11707-s015.xlsx]

## Sheet: Zm00001d010454
Sample Name	Target Name	Cт
CK127-0h	Actin1	28.1978
CK127-12h	Actin1	28.1783
CK127-24h	Actin1	28.3734
CK127-72h	Actin1	27.6621
CK127-120h	Actin1	28.8644
CK326-0h	Actin1	27.4403
CK326-12h	Actin1	28.0325
CK326-24h	Actin1	28.2355
CK326-72h	Actin1	28.4698
CK326-120h	Actin1	26.8931
C127-12h	Actin1	29.5901
C127-24h	Actin1	28.8072
C127-72h	Actin1	28.9403
C127-120h	Actin1	27.7358
C326-12h	Actin1	28.417
C326-24h	Actin1	29.3064
C326-72h	Actin1	27.6269
C326-120h	Actin1	29.5469
CK127-0h	Actin1	28.0899
CK127-12h	Actin1	28.1294
CK127-24h	Actin1	28.2562
CK127-72h	Actin1	27.5987
CK127-120h	Actin1	28.0207
CK326-0h	Actin1	27.349
CK326-12h	Actin1	28.9883
CK326-24h	Actin1	28.2761
CK326-72h	Actin1	28.2852
CK326-120h	Actin1	26.7618
C127-12h	Actin1	29.4699
C127-24h	Actin1	28.8286
C127-72h	Actin1	28.9604
C127-120h	Actin1	27.7607
C326-12h	Actin1	28.3244
C326-24h	Actin1	29.2755
C326-72h	Actin1	27.5501
C326-120h	Actin1	29.5071
CK127-0h	Actin1	28.1966
CK127-12h	Actin1	28.9847
CK127-24h	Actin1	28.1379
CK127-72h	Actin1	27.5952
CK127-120h	Actin1	28.9309
CK326-0h	Actin1	27.3152
CK326-12h	Actin1	28.9509
CK326-24h	Actin1	28.1655
CK326-72h	Actin1	28.113
CK326-120h	Actin1	26.9321
C127-12h	Actin1	29.4667
C127-24h	Actin1	28.8818
C127-72h	Actin1	28.9687
C127-120h	Actin1	27.7421
C326-12h	Actin1	28.3723
C326-24h	Actin1	29.355
C326-72h	Actin1	27.5205
C326-120h	Actin1	29.6852
CK127-0h	Zm00001d010454	32.7661
CK127-12h	Zm00001d010454	32.8569
CK127-24h	Zm00001d010454	32.5017
CK127-72h	Zm00001d010454	31.6465
CK127-120h	Zm00001d010454	32.9285
CK326-0h	Zm00001d010454	30.4638
CK326-12h	Zm00001d010454	31.0474
CK326-24h	Zm00001d010454	30.3656
CK326-72h	Zm00001d010454	31.3426
CK326-120h	Zm00001d010454	30.7117
C127-12h	Zm00001d010454	34.5144
C127-24h	Zm00001d010454	34.1532
C127-72h	Zm00001d010454	34.7656
C127-120h	Zm00001d010454	32.9111
C326-12h	Zm00001d010454	34.124
C326-24h	Zm00001d010454	32.3064
C326-72h	Zm00001d010454	30.2948
C326-120h	Zm00001d010454	30.6666
CK127-0h	Zm00001d010454	32.4436
CK127-12h	Zm00001d010454	32.5313
CK127-24h	Zm00001d010454	32.3934
CK127-72h	Zm00001d010454	32.2158
CK127-120h	Zm00001d010454	32.8613
CK326-0h	Zm00001d010454	31.2532
CK326-12h	Zm00001d010454	32.0367
CK326-24h	Zm00001d010454	30.2863
CK326-72h	Zm00001d010454	31.2496
CK326-120h	Zm00001d010454	31.119
C127-12h	Zm00001d010454	34.612
C127-24h	Zm00001d010454	33.5383
C127-72h	Zm00001d010454	34.9322
C127-120h	Zm00001d010454	32.9107
C326-12h	Zm00001d010454	34.1483
C326-24h	Zm00001d010454	32.1171
C326-72h	Zm00001d010454	30.2613
C326-120h	Zm00001d010454	30.9716
CK127-0h	Zm00001d010454	32.3376
CK127-12h	Zm00001d010454	32.508
CK127-24h	Zm00001d010454	32.1265
CK127-72h	Zm00001d010454	31.7477
CK127-120h	Zm00001d010454	32.6449
CK326-0h	Zm00001d010454	31.1433
CK326-12h	Zm00001d010454	32.0188
CK326-24h	Zm00001d010454	29.9134
CK326-72h	Zm00001d010454	31.9117
CK326-120h	Zm00001d010454	30.5503
C127-12h	Zm00001d010454	34.5582
C127-24h	Zm00001d010454	34.3218
C127-72h	Zm00001d010454	34.9688
C127-120h	Zm00001d010454	32.6326
C326-12h	Zm00001d010454	34.1679
C326-24h	Zm00001d010454	32.4533
C326-72h	Zm00001d010454	30.1834
C326-120h	Zm00001d010454	30.9718

## Sheet: Zm00001d050021
Sample Name	Target Name	Cт
CK127-0h	Actin1	28.1978
CK127-12h	Actin1	28.1783
CK127-24h	Actin1	28.3734
CK127-72h	Actin1	27.6621
CK127-120h	Actin1	28.9309
CK326-0h	Actin1	27.4403
CK326-12h	Actin1	28.0325
CK326-24h	Actin1	28.2355
CK326-72h	Actin1	28.4698
CK326-120h	Actin1	26.9321
C127-12h	Actin1	29.5901
C127-24h	Actin1	28.8072
C127-72h	Actin1	28.9403
C127-120h	Actin1	27.7358
C326-12h	Actin1	28.417
C326-24h	Actin1	29.3064
C326-72h	Actin1	27.6269
C326-120h	Actin1	29.5469
CK127-0h	Actin1	28.0899
CK127-12h	Actin1	28.1294
CK127-24h	Actin1	28.2562
CK127-72h	Actin1	27.5987
CK127-120h	Actin1	28.0207
CK326-0h	Actin1	27.349
CK326-12h	Actin1	28.9883
CK326-24h	Actin1	28.2761
CK326-72h	Actin1	28.2852
CK326-120h	Actin1	26.7618
C127-12h	Actin1	29.4699
C127-24h	Actin1	28.8286
C127-72h	Actin1	28.9604
C127-120h	Actin1	27.7607
C326-12h	Actin1	28.3244
C326-24h	Actin1	29.2755
C326-72h	Actin1	27.5501
C326-120h	Actin1	29.5071
CK127-0h	Actin1	28.1966
CK127-12h	Actin1	28.9847
CK127-24h	Actin1	28.1379
CK127-72h	Actin1	27.5952
CK127-120h	Actin1	28.8644
CK326-0h	Actin1	27.3152
CK326-12h	Actin1	28.9509
CK326-24h	Actin1	28.1655
CK326-72h	Actin1	28.113
CK326-120h	Actin1	26.8931
C127-12h	Actin1	29.4667
C127-24h	Actin1	28.8818
C127-72h	Actin1	28.9687
C127-120h	Actin1	27.7421
C326-12h	Actin1	28.3723
C326-24h	Actin1	29.355
C326-72h	Actin1	27.5205
C326-120h	Actin1	29.6852
CK127-0h	Zm00001d050021	31.4277
CK127-12h	Zm00001d050021	31.7552
CK127-24h	Zm00001d050021	30.7142
CK127-72h	Zm00001d050021	30.3536
CK127-120h	Zm00001d050021	31.6036
CK326-0h	Zm00001d050021	30.4176
CK326-12h	Zm00001d050021	31.5177
CK326-24h	Zm00001d050021	30.2691
CK326-72h	Zm00001d050021	30.7131
CK326-120h	Zm00001d050021	29.6887
C127-12h	Zm00001d050021	32.8376
C127-24h	Zm00001d050021	32.6331
C127-72h	Zm00001d050021	32.3231
C127-120h	Zm00001d050021	32.1876
C326-12h	Zm00001d050021	32.9803
C326-24h	Zm00001d050021	34.7601
C326-72h	Zm00001d050021	32.9231
C326-120h	Zm00001d050021	34.4576
CK127-0h	Zm00001d050021	31.3118
CK127-12h	Zm00001d050021	31.7613
CK127-24h	Zm00001d050021	30.7328
CK127-72h	Zm00001d050021	30.2495
CK127-120h	Zm00001d050021	31.9695
CK326-0h	Zm00001d050021	30.3399
CK326-12h	Zm00001d050021	31.5266
CK326-24h	Zm00001d050021	30.3071
CK326-72h	Zm00001d050021	30.7471
CK326-120h	Zm00001d050021	29.6851
C127-12h	Zm00001d050021	33.0399
C127-24h	Zm00001d050021	32.6471
C127-72h	Zm00001d050021	32.4171
C127-120h	Zm00001d050021	32.1999
C326-12h	Zm00001d050021	32.8941
C326-24h	Zm00001d050021	34.3615
C326-72h	Zm00001d050021	32.5271
C326-120h	Zm00001d050021	34.6199
CK127-0h	Zm00001d050021	31.2059
CK127-12h	Zm00001d050021	31.7838
CK127-24h	Zm00001d050021	30.739
CK127-72h	Zm00001d050021	30.2457
CK127-120h	Zm00001d050021	31.8457
CK326-0h	Zm00001d050021	30.355
CK326-12h	Zm00001d050021	31.4937
CK326-24h	Zm00001d050021	30.2951
CK326-72h	Zm00001d050021	30.7551
CK326-120h	Zm00001d050021	29.6837
C127-12h	Zm00001d050021	32.805
C127-24h	Zm00001d050021	32.5151
C127-72h	Zm00001d050021	32.4751
C127-120h	Zm00001d050021	32.045
C326-12h	Zm00001d050021	32.8882
C326-24h	Zm00001d050021	34.3213
C326-72h	Zm00001d050021	32.4151
C326-120h	Zm00001d050021	34.465

## Sheet: Zm00001d010459
Sample Name	Target Name	Cт
C127-120h	Actin1	27.7358
C127-120h	Actin1	27.7607
C127-120h	Actin1	27.7421
C127-12h	Actin1	29.5901
C127-12h	Actin1	29.4699
C127-12h	Actin1	29.4667
C127-24h	Actin1	28.8072
C127-24h	Actin1	28.8286
C127-24h	Actin1	28.8818
C127-72h	Actin1	28.9403
C127-72h	Actin1	28.9604
C127-72h	Actin1	28.9687
C326-120h	Actin1	29.5469
C326-120h	Actin1	29.5071
C326-120h	Actin1	29.6852
C326-12h	Actin1	28.417
C326-12h	Actin1	28.3244
C326-12h	Actin1	28.3723
C326-24h	Actin1	29.3064
C326-24h	Actin1	29.2755
C326-24h	Actin1	29.355
C326-72h	Actin1	27.6269
C326-72h	Actin1	27.5501
C326-72h	Actin1	27.5205
CK127-0h	Actin1	28.1978
CK127-0h	Actin1	28.0899
CK127-0h	Actin1	28.1966
CK127-120h	Actin1	28.9309
CK127-120h	Actin1	28.0207
CK127-120h	Actin1	28.8644
CK127-12h	Actin1	28.1783
CK127-12h	Actin1	28.1294
CK127-12h	Actin1	28.9847
CK127-24h	Actin1	28.3734
CK127-24h	Actin1	28.2562
CK127-24h	Actin1	28.1379
CK127-72h	Actin1	27.6621
CK127-72h	Actin1	27.5987
CK127-72h	Actin1	27.5952
CK326-0h	Actin1	27.4403
CK326-0h	Actin1	27.349
CK326-0h	Actin1	27.3152
CK326-120h	Actin1	26.9321
CK326-120h	Actin1	26.7618
CK326-120h	Actin1	26.8931
CK326-12h	Actin1	28.0325
CK326-12h	Actin1	28.9883
CK326-12h	Actin1	28.9509
CK326-24h	Actin1	28.2355
CK326-24h	Actin1	28.2761
CK326-24h	Actin1	28.1655
CK326-72h	Actin1	28.4698
CK326-72h	Actin1	28.2852
CK326-72h	Actin1	28.113
C127-120h	Zm00001d010459	31.8972
C127-120h	Zm00001d010459	32.0587
C127-120h	Zm00001d010459	31.8587
C127-12h	Zm00001d010459	34.4746
C127-12h	Zm00001d010459	34.6484
C127-12h	Zm00001d010459	34.8726
C127-24h	Zm00001d010459	33.6955
C127-24h	Zm00001d010459	33.6398
C127-24h	Zm00001d010459	33.5649
C127-72h	Zm00001d010459	33.1659
C127-72h	Zm00001d010459	33.3911
C127-72h	Zm00001d010459	33.1919
C326-120h	Zm00001d010459	32.8511
C326-120h	Zm00001d010459	32.8587
C326-120h	Zm00001d010459	32.9911
C326-12h	Zm00001d010459	33.2156
C326-12h	Zm00001d010459	33.492
C326-12h	Zm00001d010459	33.2111
C326-24h	Zm00001d010459	33.6801
C326-24h	Zm00001d010459	33.4398
C326-24h	Zm00001d010459	33.6963
C326-72h	Zm00001d010459	31.5911
C326-72h	Zm00001d010459	31.7659
C326-72h	Zm00001d010459	31.4911
CK127-0h	Zm00001d010459	33.3281
CK127-0h	Zm00001d010459	33.5281
CK127-0h	Zm00001d010459	33.7145
CK127-120h	Zm00001d010459	33.9355
CK127-120h	Zm00001d010459	33.7698
CK127-120h	Zm00001d010459	33.6049
CK127-12h	Zm00001d010459	33.6785
CK127-12h	Zm00001d010459	33.5918
CK127-12h	Zm00001d010459	33.6216
CK127-24h	Zm00001d010459	33.8608
CK127-24h	Zm00001d010459	32.9801
CK127-24h	Zm00001d010459	32.9711
CK127-72h	Zm00001d010459	32.8761
CK127-72h	Zm00001d010459	32.6475
CK127-72h	Zm00001d010459	32.6587
CK326-0h	Zm00001d010459	32.724
CK326-0h	Zm00001d010459	32.8929
CK326-0h	Zm00001d010459	32.8673
CK326-120h	Zm00001d010459	31.582
CK326-120h	Zm00001d010459	31.6907
CK326-120h	Zm00001d010459	31.7407
CK326-12h	Zm00001d010459	33.6156
CK326-12h	Zm00001d010459	33.622
CK326-12h	Zm00001d010459	33.7811
CK326-24h	Zm00001d010459	32.7159
CK326-24h	Zm00001d010459	32.6129
CK326-24h	Zm00001d010459	32.7425
CK326-72h	Zm00001d010459	32.7432
CK326-72h	Zm00001d010459	32.9371
CK326-72h	Zm00001d010459	32.7932

## Sheet: Zm00001d010458
Sample Name	Target Name	Cт
C127-120h	Actin1	27.7358
C127-120h	Actin1	27.7607
C127-120h	Actin1	27.7421
C127-12h	Actin1	29.5901
C127-12h	Actin1	29.4699
C127-12h	Actin1	29.4667
C127-24h	Actin1	28.8072
C127-24h	Actin1	28.8286
C127-24h	Actin1	28.8818
C127-72h	Actin1	28.9403
C127-72h	Actin1	28.9604
C127-72h	Actin1	28.9687
C326-120h	Actin1	29.5469
C326-120h	Actin1	29.5071
C326-120h	Actin1	29.6852
C326-12h	Actin1	28.417
C326-12h	Actin1	28.3244
C326-12h	Actin1	28.3723
C326-24h	Actin1	29.3064
C326-24h	Actin1	29.2755
C326-24h	Actin1	29.355
C326-72h	Actin1	27.6269
C326-72h	Actin1	27.5501
C326-72h	Actin1	27.5205
CK127-0h	Actin1	28.1978
CK127-0h	Actin1	28.0899
CK127-0h	Actin1	28.1966
CK1271-120h	Actin1	28.8644
CK1271-120h	Actin1	28.0207
CK1271-120h	Actin1	28.9309
CK127-120h	Actin1	26.8931
CK127-120h	Actin1	26.7618
CK127-120h	Actin1	26.9321
CK127-12h	Actin1	28.1783
CK127-12h	Actin1	28.1294
CK127-12h	Actin1	28.9847
CK127-24h	Actin1	28.3734
CK127-24h	Actin1	28.2562
CK127-24h	Actin1	28.1379
CK127-72h	Actin1	27.6621
CK127-72h	Actin1	27.5987
CK127-72h	Actin1	27.5952
CK326-0h	Actin1	27.4403
CK326-0h	Actin1	27.349
CK326-0h	Actin1	27.3152
CK326-12h	Actin1	28.0325
CK326-12h	Actin1	28.9883
CK326-12h	Actin1	28.9509
CK326-24h	Actin1	28.2355
CK326-24h	Actin1	28.2761
CK326-24h	Actin1	28.1655
CK326-72h	Actin1	28.4698
CK326-72h	Actin1	28.2852
CK326-72h	Actin1	28.113
C127-120h	Zm00001d010458	32.7111
C127-120h	Zm00001d010458	32.7107
C127-120h	Zm00001d010458	34.8326
C127-12h	Zm00001d010458	34.5144
C127-12h	Zm00001d010458	34.692
C127-12h	Zm00001d010458	31.4169
C127-24h	Zm00001d010458	34.1532
C127-24h	Zm00001d010458	33.6183
C127-24h	Zm00001d010458	34.3218
C127-72h	Zm00001d010458	34.6656
C127-72h	Zm00001d010458	34.9322
C127-72h	Zm00001d010458	33.9688
C326-120h	Zm00001d010458	30.5366
C326-120h	Zm00001d010458	30.9816
C326-120h	Zm00001d010458	29.9718
C326-12h	Zm00001d010458	34.224
C326-12h	Zm00001d010458	34.0183
C326-12h	Zm00001d010458	32.7679
C326-24h	Zm00001d010458	32.3064
C326-24h	Zm00001d010458	32.1771
C326-24h	Zm00001d010458	34.0333
C326-72h	Zm00001d010458	30.2948
C326-72h	Zm00001d010458	30.2713
C326-72h	Zm00001d010458	32.1834
CK127-0h	Zm00001d010458	32.7661
CK127-0h	Zm00001d010458	32.4436
CK127-0h	Zm00001d010458	32.1376
CK127-120h	Zm00001d010458	31.219
CK127-120h	Zm00001d010458	32.1285
CK127-120h	Zm00001d010458	31.6103
CK127-120h	Zm00001d010458	31.8517
CK127-120h	Zm00001d010458	32.0013
CK127-120h	Zm00001d010458	32.6449
CK127-12h	Zm00001d010458	32.6569
CK127-12h	Zm00001d010458	32.1313
CK127-12h	Zm00001d010458	32.108
CK127-24h	Zm00001d010458	32.5017
CK127-24h	Zm00001d010458	32.3934
CK127-24h	Zm00001d010458	31.9265
CK127-72h	Zm00001d010458	31.9265
CK127-72h	Zm00001d010458	32.1958
CK127-72h	Zm00001d010458	30.8177
CK326-0h	Zm00001d010458	30.7638
CK326-0h	Zm00001d010458	31.2532
CK326-0h	Zm00001d010458	32.1433
CK326-12h	Zm00001d010458	31.3474
CK326-12h	Zm00001d010458	31.0367
CK326-12h	Zm00001d010458	30.0188
CK326-24h	Zm00001d010458	30.1456
CK326-24h	Zm00001d010458	31.1863
CK326-24h	Zm00001d010458	31.5134
CK326-72h	Zm00001d010458	31.3426
CK326-72h	Zm00001d010458	30.1496
CK326-72h	Zm00001d010458	30.9117
